# Supplementary material
Source: publisher site journal article supplement (http://www.dovepress.com/get_supplementary_file.php?f=230262.docx)
Supplement: Supplementary file 1 [file get_supplementary_file.php]

**PubMed**

(oral[title/abstract] OR saliva[title/abstract] OR tongue[title/abstract] OR salivary[title/abstract]) **AND** (microbiome[title/abstract] OR microbiota[title/abstract] OR bacteria*[title/abstract] OR microbial[title/abstract] OR microorganism[title/abstract] OR microbe[title/abstract] OR marker[title/abstract] OR organism) **AND** (Esophageal[title/abstract] OR Esophagus[title/abstract] OR gastric[title/abstract] OR gastroenteric[title/abstract] OR gastrointestin*[title/abstract] OR intestin*[title/abstract] OR stomach[title/abstract] OR bowel*[title/abstract] OR Liver[title/abstract] OR gallbladder[title/abstract] OR biliary tract[title/abstract] OR neuroendocrine[title/abstract] OR CRC[title/abstract] OR colorect*[title/abstract] OR recta*[title/abstract] OR rectum*[title/abstract] OR colon*[title/abstract]) **AND** (carcinoma*[title/abstract] OR cancer*[title/abstract] OR neoplas*[title/abstract] OR adenoma*[title/abstract] OR malignan*[title/abstract] OR tumor*[title/abstract] OR tumour*[title/abstract] OR adenocarcinoma*[title/abstract]) **AND** (sensitiv*[title/abstract] OR specific*[title/abstract] OR accura*[title/abstract] OR "receiver operating characteristic curve"[title/abstract] OR "ROC curve"[title/abstract] OR "area under curve"[title/abstract] OR "area under the curve"[title/abstract] OR AUC[title/abstract] OR "C statistic"[title/abstract] OR discriminat*[title/abstract] OR reclassif*[title/abstract] OR prevalen*[title/abstract] OR association[title/abstract])

**Web of Science**

(TS=((oral OR saliva OR tongue OR salivary) **AND** (microbiome OR microbiota OR bacteria* OR microbial OR microorganism OR microbe OR marker OR organism) **AND** (Esophageal OR Esophagus OR gastric OR gastroenteric OR gastrointestin* OR intestin* OR stomach OR bowel* OR liver OR gallbladder OR biliary tract OR neuroendocrine OR CRC OR colorect* OR recta* OR rectum* OR colon*) **AND** (carcinoma* OR cancer* OR neoplas* OR adenoma* OR malignan* OR tumor* OR tumour* OR adenocarcinoma*) **AND** (sensitiv* OR specific* OR accura* OR "receiver operating characteristic curve" OR "ROC curve" OR "area under curve" OR "area under the curve" OR AUC OR "C statistic" OR discriminat* OR reclassif* OR prevalen* OR association)))

**Embase**

(oral OR saliva OR tongue OR salivary) **AND** (microbiome OR microbiota OR bacteria* OR microbial OR microorganism OR microbe OR marker OR organism) **AND** (Esophageal OR Esophagus OR gastric OR gastroenteric OR gastrointestin* OR intestin* OR stomach OR bowel* OR liver OR gallbladder OR biliary tract OR neuroendocrine OR CRC OR colorect* OR recta* OR rectum* OR colon*) **AND** (carcinoma* OR cancer* OR neoplas* OR adenoma* OR malignan* OR tumor* OR tumour* OR adenocarcinoma*) **AND** (sensitiv* OR specific* OR accura* OR "receiver operating characteristic curve" OR "ROC curve" OR "area under curve" OR "area under the curve" OR AUC OR "C statistic" OR discriminat* OR reclassif* OR prevalen* OR association)
